# Supplementary material for: Cloning-free CRISPR
Source: PubMed Central journal article supplement — Stem Cell Reports. 2015 Oct 29;5(5):908–17. doi: 10.1016/j.stemcr.2015.09.022 (PMC4649464; doi:10.1016/j.stemcr.2015.09.022), 2015-10-29
Supplement: mmc1.pdf [file mmc1.pdf]

**Stem Cell Reports**

**Supplemental Information**

# **Cloning-free CRISPR**

**Mandana Arbab, Sharanya Srinivasan, Tatsunori Hashimoto, Niels Geijsen, and Richard I. Sherwood**

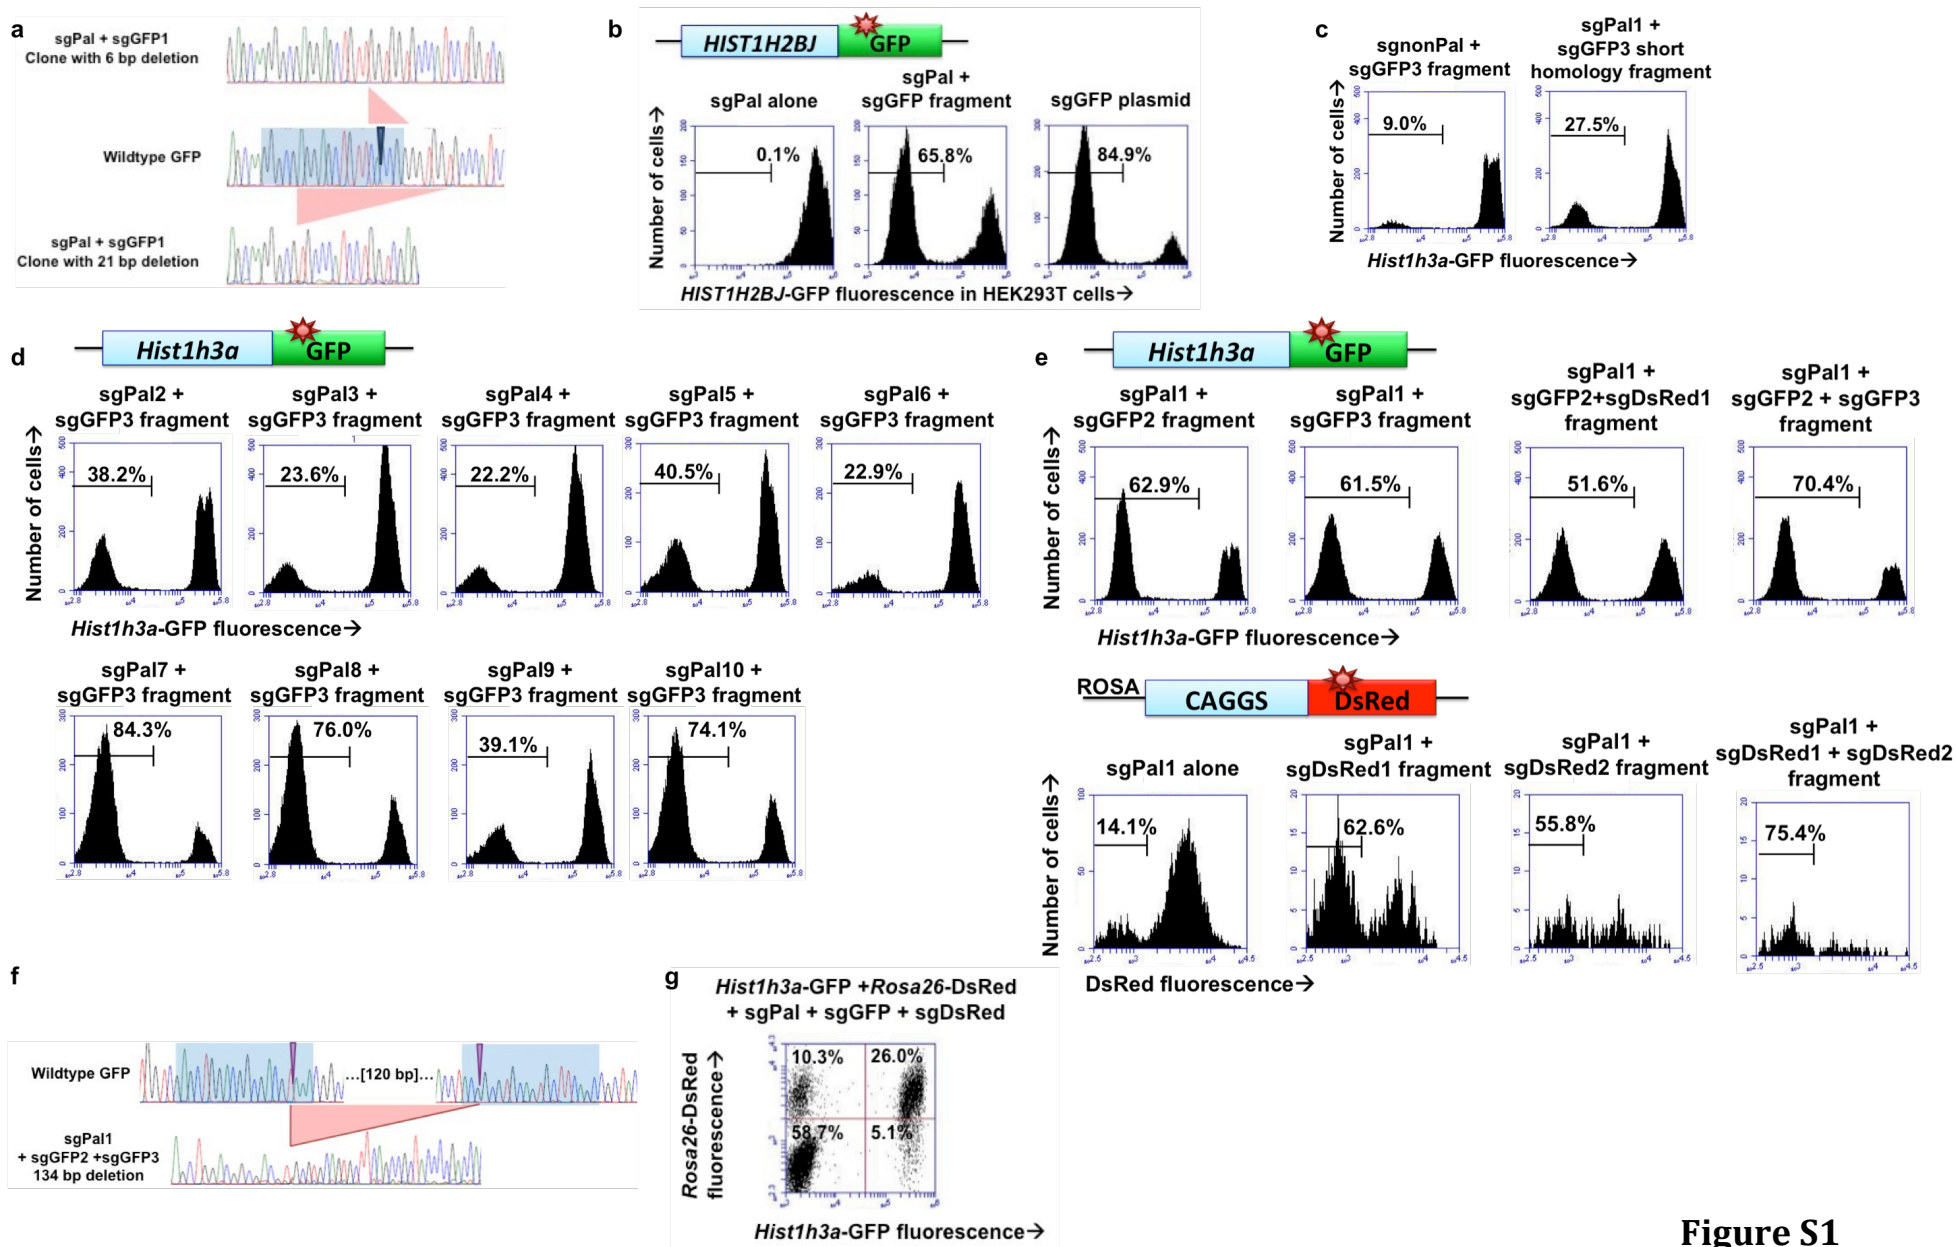

Figure S1

## Figure S1

a. Sanger sequencing analysis of genomic DNA from two *Hist1h3a*-GFP<sup>-</sup> clones produced through scCRISPR with sgPal and sgGFP1, showing short deletions surrounding the expected CRISPR cut site. b. Histograms showing flow cytometric *HIST1H2BJ*-GFP fluorescence (x-axis) after electroporation with Cas9 and sgPal alone (left panel), sgPal and sgGFP1 homology fragment (middle panel), or sgGFP1 plasmid (right panel). c. Histograms showing flow cytometric *Hist1h3a*-GFP fluorescence (x-axis) after electroporation with Cas9, sgRNA plasmid, and homology fragment. Co-electroporation of a non-palindromic sgRNA plasmid (sgnonPal) exhibits substantially less GFP loss than sgPal1 (Figure 1), indicating that self-cleavage is an important factor in scCRISPR efficiency. A homology fragment with 30 bp of homology shows substantially less GFP loss than the standard homology arms (Figure 1), indicating that homology arm length is important in scCRISPR efficiency. Taken together, these results argue that scCRISPR functions through homologous recombination. d. Histograms showing flow cytometric *Hist1h3a*-GFP fluorescence (x-axis) after electroporation with Cas9, palindromic sgRNA plasmids, and homology fragment. Palindromic sgRNA plasmids (sgPal2-10) all exhibit substantial GFP loss, but differ widely in their relative efficiency. sgPal7 induces the highest degree of GFP loss among the ten palindromic sgRNA's. e. Histograms showing flow cytometric *Hist1h3a*-GFP fluorescence (x-axis, a) or DsRed fluorescence (x-axis, b) after electroporation with Cas9, sgRNA plasmid, and homology fragment. In these plots, sgPal is combined with homology fragments targeting two additional sites within the GFP gene (sgGFP2 and sgGFP3) as well as two locations within the dsRed gene (sgDsRed1 and sgDsRed2), producing >55% loss of fluorescence in all cases. Additionally, multiplexing sgGFP2 and sgGFP3 in *Hist1h3a*-GFP cells, or sgDsRed1 and sgDsRed2 in dsRed positive cells increases the fraction of cells with loss of fluorescence. Multiplexing sgGFP2 and sgDsRed1 in single positive *Hist1h3a*-GFP mouse ESCs cells only minimally decreases the fraction of cells with loss of GFP fluorescence, indicating that scCRISPR can lead to efficient and specific multiplexed mutation. f. Sanger sequencing analysis of a gel-isolated deletion band from bulk genomic DNA of *Hist1h3a*-GFP cells after multiplexed scCRISPR with sgPal1, sgGFP2, and sgGFP3. This band shows a 134 bp deletion with junctions at the predicted CRISPR cut sites. g. Multiplexed mutation of GFP (x-axis) and dsRed (y-axis) in *Hist1h3a*-GFP Rosa26-dsRed mouse ESCs (left panel) after co-introduction of Cas9, sgPal plasmid, and sgGFP2 and sgDsRed1 standard length homology fragments.

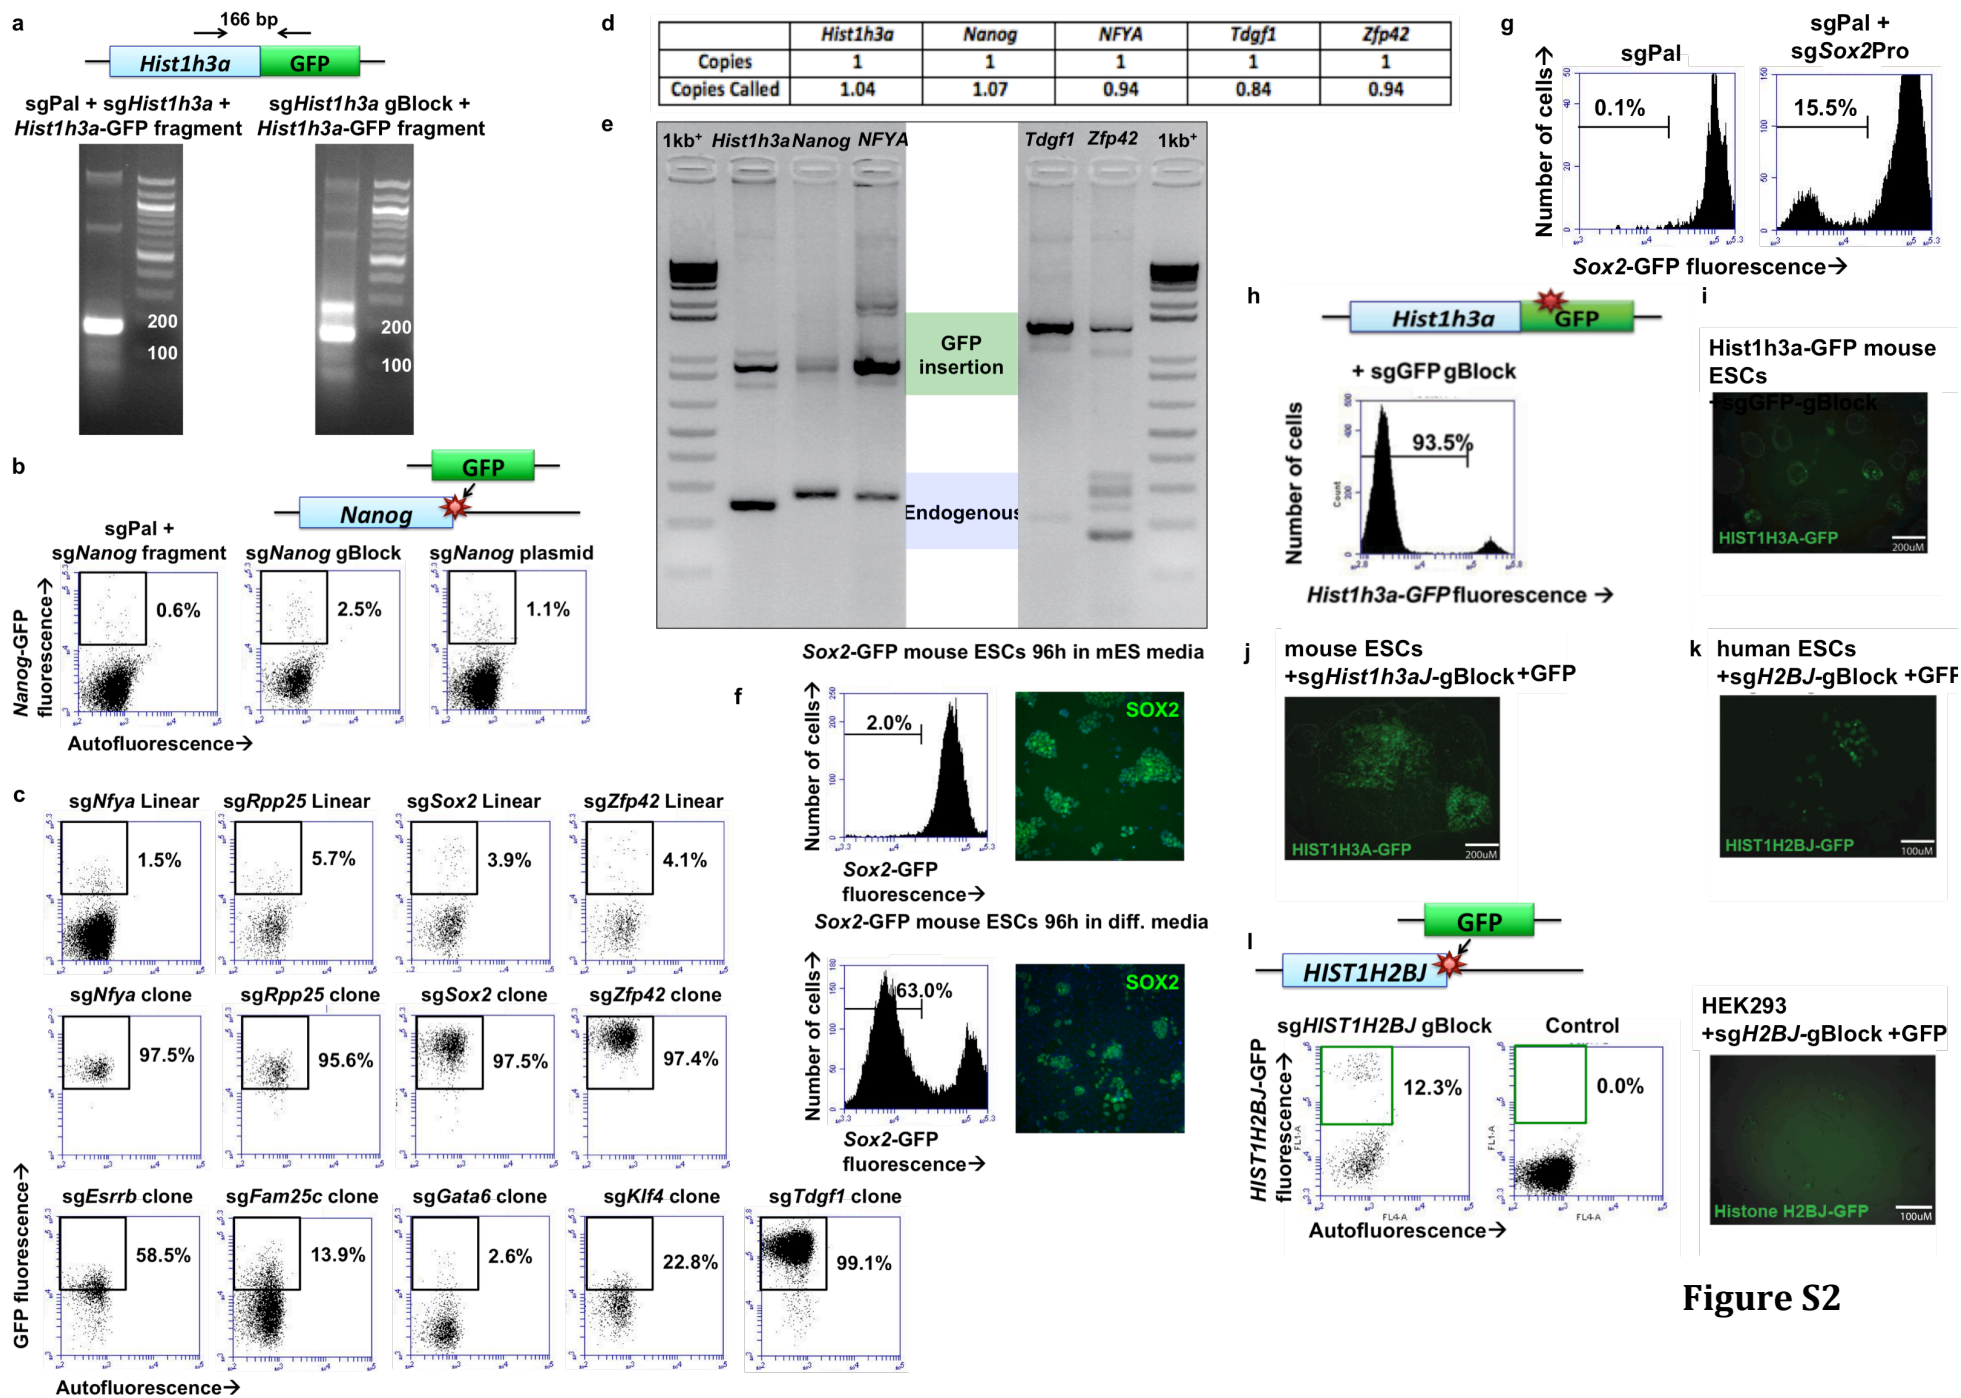

Figure S2

## Figure S2

a. Flow cytometric analysis shows efficient generation of *Nanog*-GFP knock-in mouse ESCs (y-axis) after scCRISPR, gBlock-CRISPR, and plasmid-based CRISPR using a PCR-amplified GFP fragment with 80 bp *Nanog* homology arms. b. Genomic DNA PCR analysis using a forward primer in the *Hist1h3a* coding region and a reverse primer in the GFP coding region that will produce a 166 bp band only if GFP is inserted into the *Hist1h3a* locus. scCRISPR and gBlock-CRISPR-based knock-in using PCR-amplified GFP fragments with 80 bp *Hist1h3a* homology arms show robust bands indicating successful knock-in. c. Flow cytometric analysis shows efficient generation of GFP knock-in at four loci in mouse ESC (y-axis) using a PCR-amplified GFP fragment with 80 bp homology arms. Top row *Nfya*, *Rpp25*, and *Sox2* lines are C-terminal GFP fusion proteins and *Zfp42* is a GFP replacement. Middle and bottom row show flow cytometric analysis of nine clonal mouse ESC knock-in lines, all generated using PCR-amplified 80 bp homology arms. All are C-terminal GFP fusion cell lines except *Tdgf1* and *Zfp42*, which are GFP replacements. All lines have clonal knock-in in every cell, but GFP fluorescence intensities vary based on the native gene expression levels. Bulk measurements of GFP fluorescence were only performed for the four loci in the top row. d. Copies of GFP called by quantitative-PCR using Taqman Copy Number Assay. GFP integrations were assayed by comparing CT amplification values of GFP and *Tfrc* as a reference gene, using eGFP FAM-labeled probes and VIC-labeled TAMRA probes, respectively. Copies per cell were calculated using CopyCaller software. e. PCR amplification spanning the appropriate GFP integration sites for *Hist1h3a*, *Nanog*, *Nfya*, *Tdgf1*, and *Zfp42* heterozygous GFP cell lines. Upper bands in *Hist1h3a*, *Nanog*, and *Nfya* cell lines indicate insertion of  $\pm 750$  bp GFP sequence. The integrated sequence in *Tdgf1* and *Zfp42* cell lines encodes GFP with an extended poly-A tail, and is  $\pm 1150$  bp long. The lower bands show amplification of the endogenous loci. f. Fluorescence imaging of *Sox2*-GFP cells and histograms showing flow cytometry of *Sox2*-GFP fluorescence (x-axis) prior to, and 96 hours after mouse ESC incubation with serum-reduced media. Stem cell differentiation leads to substantial loss of SOX2 expression and a loss of GFP fluorescence in 63% of cells is observed accordingly, indicating GFP reports faithfully on *Sox2* gene expression. g. Histograms showing flow cytometric *Sox2*-GFP fluorescence (x-axis) after electroporation with Cas9 with sgPal1 alone, or in combination with an sgRNA fragment targeted to the *Sox2* promoter region (sg*Sox2*Pro). sgPal1 alone does not affect *Sox2*-GFP expression while combined sgPal1 with sg*Sox2*Pro fragment induces a loss of measurable GFP fluorescence, indicating GFP signal is regulated by *Sox2* regulatory elements. h-i. Flow cytometric and fluorescence microscopy analysis show efficient loss of *Hist1h3a*-GFP after co-electroporation of Cas9 with GFP-targeting gBlock sgRNA. j-k. Fluorescence microscopy of nuclear GFP expression in mouse and human ESCs after targeted GFP insertion into *Hist1h3a* or *HIST1H2BJ* loci, respectively. Cells were targeted by co-electroporation of Cas9, sg*Hist1h3a* or sg*HIST1H2BJ* PCR amplified gBlocks, along with PCR-amplified GFP fragments with 80 bp overhangs homologous to the respective regions. l. Flow cytometric analysis of HEK293T shows efficient generation of *HIST1H2BJ*-GFP knock-in cells (y-axis) after, gBlock-CRISPR using a PCR-amplified GFP fragment with 80 bp *HIST1H2BJ* homology arms.

**Supplemental Table 1: Comparison of time, cost, and efficiency of CRISPR/Cas9 mutation and gene knock-in using different methods of sgRNA introduction**

|                                   |                                                                                                                                                                                                                                                                                                                                             | Cost in USD | Mutation Rate | Gene Knock-In |
|-----------------------------------|---------------------------------------------------------------------------------------------------------------------------------------------------------------------------------------------------------------------------------------------------------------------------------------------------------------------------------------------|-------------|---------------|---------------|
| <b>sgPal</b>                      | <p>1 day</p> <ul style="list-style-type: none"> <li>- Order oligo's</li> <li>- PCR amplify</li> <li>- Target Cells</li> </ul>                                                                                                                                                                                                               | ± 15        | ≥ 85%         | ± 0.5%        |
| <b>gBlock sgRNA</b>               | <p>4 days</p> <ul style="list-style-type: none"> <li>- Order gBlock</li> <li>- PCR amplify</li> <li>- Target Cells</li> </ul>                                                                                                                                                                                                               | ± 90        | ≥ 90%         | ± 3%          |
| <b>conventional plasmid sgRNA</b> | <p>1 day 1 day 1 day 2 days 1 day</p> <ul style="list-style-type: none"> <li>- Order oligo's</li> <li>- Anneal</li> <li>- Digest Vector</li> <li>- Transformation</li> <li>- Colony Picking</li> <li>- Miniprep</li> <li>- Sequence verification</li> <li>- Amplify bacterial colony</li> <li>- Midiprep</li> <li>- Target Cells</li> </ul> | ± 85 - 100  | ≥ 90%         | ± 1%          |

**Experimental Procedures Supplemental Table:  
Predicted off-target effects of scCRISPR palindromic sgRNAs**

| Name    | Sequence                      | BLAST hits   | Missmatches |           | 3' nt  |
|---------|-------------------------------|--------------|-------------|-----------|--------|
|         |                               |              | Overall     | Last 11nt |        |
| sgPal1  | <b>GCTCTGTGACT AGTCACAGAG</b> | Human cr.2   | 4           | 2         | ...GGG |
|         |                               | Human cr.8   | 4           | 1         | ...AGG |
|         |                               | Human cr.10  | 4           | 2         | ...GGG |
|         |                               | Human cr.20  | 4           | 2         | ...AGG |
|         |                               | Human cr.22  | 4           | 2         | ...GGG |
|         |                               | Mouse cr.11  | 4           | 2         | ...GGG |
| sgPal2  | <b>GCGGAACACA TGTGTTCCG</b>   | Mouse cr.9   | 4           | 2         | ...AGG |
|         |                               | Human cr.22  | 4           | 2         | ...GGG |
|         |                               | Mouse cr.5   | 4           | 2         | ...GGG |
|         |                               | Mouse cr.17  | 4           | 1         | ...CGG |
| sgPal3  | <b>TCGATCGTCG CGACGATCGA</b>  | none         | -           | -         | -      |
| sgPal4  | <b>CGACGATCGA TCGATCGTCG</b>  | none         | -           | -         | -      |
| sgPal5  | <b>GCAGTACTTTG CAAAGTACTG</b> | Human cr.1   | 4           | 2         | ...GGG |
|         |                               | Human chr.2  | 4           | 2         | ...TGG |
|         |                               | Mouse chr.2  | 3           | 2         | ...TGG |
|         |                               | Mouse chr.6  | 4           | 1         | ...TGG |
|         |                               | Mouse chr.15 | 4           | 2         | ...GGG |
|         |                               | Mouse chr.19 | 4           | 1         | ...GGG |
| sgPal6  | <b>GTCCCATCCTT AAGGATGGGA</b> | Human cr.6   | 4           | 2         | ...TGG |
|         |                               | Human chr.9  | 4           | 2         | ...TGG |
|         |                               | Mouse chr.2  | 4           | 2         | ...CGG |
|         |                               | Mouse chr.5  | 4           | 2         | ...AGG |
|         |                               | Mouse chr.11 | 4           | 2         | ...GGG |
|         |                               | Mouse chr.11 | 4           | 2         | ...TGG |
|         |                               | Mouse chr.12 | 4           | 2         | ...TGG |
|         |                               | Mouse chr.16 | 4           | 2         | ...AGG |
|         |                               | Human cr.16  | 4           | 1         | ...AGG |
| sgPal7  | <b>GGCTTAGTACT AGTACTAAGC</b> | Mouse chr.1  | 4           | 1         | ...AGG |
|         |                               | Human chr.2  | 4           | 2         | ...CGG |
| sgPal8  | <b>GGCCTTTCGAC GTCGAAAGGC</b> | Human chr.2  | 4           | 2         | ...GGG |
|         |                               | Human chr.4  | 4           | 1         | ...AGG |
|         |                               | Mouse chr.1  | 4           | 2         | ...AGG |
|         |                               | Human chr.1  | 4           | 2         | ...AGG |
| sgPal9  | <b>GCGACCTGCAT ATGCAGGTCG</b> | Human chr.1  | 4           | 1         | ...GGG |
|         |                               | Human chr.17 | 4           | 2         | ...AGG |
|         |                               | Human chr.18 | 4           | 2         | ...GGG |
|         |                               | Mouse chr.11 | 4           | 2         | ...TGG |
| sgPal10 | <b>GAATCTGCCAG CTGGCAGATT</b> | Human chr.1  | 4           | 2         | ...GGG |
|         |                               | Human chr.9  | 4           | 2         | ...AGG |
|         |                               | Human chr.11 | 4           | 2         | ...GGG |
|         |                               | Human chr.15 | 4           | 2         | ...AGG |
|         |                               | Human chr.22 | 4           | 1         | ...AGG |
|         |                               | Human chr.22 | 4           | 2         | ...TGG |
|         |                               | Mouse chr.2  | 4           | 2         | ...GGG |
|         |                               | Mouse chr.12 | 4           | 2         | ...GGG |
|         |                               | Mouse chr.13 | 4           | 1         | ...TGG |
|         |                               | Mouse chr.17 | 4           | 2         | ...TGG |

## Experimental Procedures Supplemental Tables: Oligonucleotides used in this work

| Palindromic sgRNA sequences |                        |                                                            |
|-----------------------------|------------------------|------------------------------------------------------------|
| sgPal1                      | GCTCTGTGACTAGTCACAGAG  | Among most efficient, used for the majority of experiments |
| sgPal2                      | GCGGAACACATGTGTTCCG    |                                                            |
| sgPal3                      | GTCGATCGTCGCGACGATCGA  |                                                            |
| sgPal4                      | GCGACGATCGATCGATCGTCCG |                                                            |
| sgPal5                      | GCAGTACTTTGCAAAGTACTG  |                                                            |
| sgPal6                      | GTCCCATCCTTAAGGATGGGA  |                                                            |
| sgPal7                      | GGCTTAGTACTAGTACTAAGC  | Most efficient                                             |
| sgPal8                      | GGCCTTTCGACGTCGAAAGGC  | Among most efficient                                       |
| sgPal9                      | GCGACCTGCATATGCAGGTCG  |                                                            |
| sgPal10                     | GAATCTGCCAGCTGGCAGATT  | Among most efficient                                       |

| sgRNA sequences for plasmid control tests |                       |  |
|-------------------------------------------|-----------------------|--|
| sgGFP3                                    | GCTGAAGCACTGCACGCCGT  |  |
| sg <i>Hist1h3a</i>                        | GTTAATTCGGTAGAACTGTA  |  |
| sg <i>Nanog</i>                           | GTATGAGACTTACGCAACATC |  |

| scCRISPR primer sequences            |                                                                                                      |                                            |
|--------------------------------------|------------------------------------------------------------------------------------------------------|--------------------------------------------|
| scCRISPR_homology_fw                 | TGTTTTAAAATGGACTATCATATGCTTACCGTAACTTAAAAGTA<br>TTTCGATTTCTTGGCTTTATATATCTTGTGAAAGGACGAAACA<br>CC    | Use in first PCR of all scCRISPR oligos    |
| scCRISPR_homology_rv                 | GTTGATAACGGACTAGCCTTATTTAAACTTGCTATGCTGTTTCC<br>AGCATAGCTCTTAAAC                                     | Use in first PCR of all scCRISPR oligos    |
| scCRISPR_homology_extension_fw       | GTACAAAATACGTGACGTAGAAAAGTAATAATTTCTTGGGTAGTT<br>TGCAGTTTTAAAATTATGTTTTAAAATGGACTATCATATGCTTAA<br>CC | Use in second PCR of all scCRISPR oligos   |
| scCRISPR_homology_extension_rv       | ATTTTAACTTGCTATTTCTAGCTCTAAAACAAAAAGCACCGAC<br>TCGGTGCCACTTTTTCAAGTTGATAACGGACTAGCCTTATTTAA<br>AC    | Use in second PCR of all scCRISPR oligos   |
| scCRISPR_homology_doubleextension_fw | CGATACAAGGCTGTTAGAGAGATAATTAGAATTAATTTGACTGT<br>AAACACAAAAGATATTAGTACAAAATACGTGACGTAGAAAAGTAAT<br>AA | Use to produce long scCRISPR homology arms |
| scCRISPR_homology_doubleextension_rv | TCAATGTATCTTATCATGTCTGCTCGATTTTAACTTGCTATTTCT<br>AGCTCTAAAACAAAA                                     | Use to produce long scCRISPR homology arms |



**scCRISPR sgRNA sequences**

All scCRISPR oligonucleotides were ordered using format described in the methods

|             |                       |  |
|-------------|-----------------------|--|
| sgGFP1      | GGGCGAGGAGCTGTTCACCG  |  |
| sgGFP2      | GAGCTGGACGGCGACGTAAA  |  |
| sgGFP3      | GCTGAAGCACTGCACGCCGT  |  |
| sgHist1h3a  | GTTAATCCGTAGAACTGTA   |  |
| sgNanog     | GTATGAGACTTACGCAACATC |  |
| sgDsRed1    | GAACTCCTTGATGACGTCTT  |  |
| sgDsRed2    | GCCAAGCTGAAGGTGACCAA  |  |
| sgHIST1H2BJ | GCGCTAAGTAAACAGTGAGT  |  |
| sgEsrrb     | GTGATGGCCAGCACATGGA   |  |
| sgFam25c    | GGCCAGCCATGCTGGTAGGC  |  |
| sgGata6     | GCCTGAGCTGGTGCTACCAAG |  |
| sgKlf4      | GCACTTTTAAATCCCACGTAG |  |
| sgNfya      | GTTTCCTAACCACAGGAGGG  |  |
| sgRpp25     | GCTCAGAGGCGAGAATTCTC  |  |
| sgSox2      | GTGAGGGCTGGACTGCCAAC  |  |
| sgTdgf1     | GAGATGGGGTACTTCTCATCC |  |
| sgZfp42     | GAATGAACAAATGAAGAAAA  |  |
| sgXrcc6     | GGGCGAGGAAGAGGAAGAGG  |  |
| sgXrcc5     | GCATCACCCCTTGTCACCATG |  |
| sgXrcc4     | GATGACATGGCTATGGAGAA  |  |
| sgPrkdc     | GAGAGTAATGCATAACCTTC  |  |
| sgDclre1c   | GCAGATATCTTTAGTTGATG  |  |
| sgLig4      | GAAAGAGAGAGGATGGCTTA  |  |
| sgParp1     | GTGGCCACCTTCCAGAAGC   |  |
| sgXrcc1     | GTCCGCCTTGAGAAGATTTT  |  |
| sgNhej1     | GCCAGGCTCACACCCATCAG  |  |
| sgPnkp      | GACACTGTCCTCTACCGAGA  |  |
| sgRif1      | GAGACAAACCTTTATTACTT  |  |
| sgTdp1      | GTCAGCATCCTCTCACCCCC  |  |
| sgTrp53bp1  | GAATCTTCTATTATCAGGCA  |  |

| <b>gBlock-CRISPR</b>              |                                                                   |                                         |
|-----------------------------------|-------------------------------------------------------------------|-----------------------------------------|
| gBlock-CRISPR_fw                  | TGAGTATTACGGCATGTGAGGGC                                           | Use in PCR of all gBlock-CRISPR gBlocks |
| gBlock-CRISPR_rv                  | TCAATGTATCTTATCATGTCTGCTCGA                                       | Use in PCR of all gBlock-CRISPR gBlocks |
| Homologous recombination primers  |                                                                   |                                         |
| <i>Hist1h3a</i> HDR_GFP_fw        | GGACATCCAAGTGGCCCGCCGCATCCGCGGGGAGAGGGCG<br>GTGAGCAAGGGCGAGGAGCT  |                                         |
| <i>Hist1h3a</i> HDR_GFP_rv        | AAATCGTGTGTGGCTCTGAAAAGAGCCTTTGGTTAATTCC<br>TGAGGAGTGAATTGCGGCCG  |                                         |
| <i>Hist1h3a</i> HDR_Extension_fw  | TGTGCGCCATCCACGCCAAGCGTGTACCATCATGCCAAGGACA<br>TCCAAGTGGCCCGCC    |                                         |
| <i>Hist1h3a</i> HDR_Extension_rv  | TTCGTTTAAGGATGGAGTAAATTACAGCATTCTTACTTGAAATC<br>GTGTGTGGCTCTGAAA  |                                         |
| <i>Nanog</i> HDR_GFP_fw           | ATTATTCCTGAACTACTCTGTGACTCCACCAGGTGAAATA<br>GTGAGCAAGGGCGAGGAGCT  |                                         |
| <i>Nanog</i> HDR_GFP_rv           | GAAGGAACCTGGCTTTGCCCTGACTTTAAGCCAGATGTT<br>TGAGGAGTGAATTGCGGCCG   |                                         |
| <i>Nanog</i> HDR_Extension_fw     | CCATGCGCATTTTAGCACCCACAAAGCCTTGGAAATTATTCCTGAA<br>CTACTCTGTGACTCC |                                         |
| <i>Nanog</i> HDR_Extension_rv     | aataaatcttaaaaaaaTATGAAAATATTTGGAAGAAGGAAGGAACC<br>TGGCTTTGCC     |                                         |
| <i>HIST1H2BJ</i> HDR_GFP_fw       | CGAGGGTACTAAGGCCGTCACCAAGTACACCAGCGCTAAG<br>GTGAGCAAGGGCGAGGAGCT  |                                         |
| <i>HIST1H2BJ</i> HDR_GFP_rv       | GGTGGCTCTTAAAAGAGCCGTTAGGGTTGAGAGTTTGCAA<br>TGAGGAGTGAATTGCGGCCG  |                                         |
| <i>HIST1H2BJ</i> HDR_Extension_fw | CCTGCTGCTGCCTGGGAGTTGGCCAAGCACGCCGTGTCCGAGGG<br>TACTAAGCCGCTCAC   |                                         |
| <i>HIST1H2BJ</i> HDR_Extension_rv | AGGAGGAATACAAGCACCAGCTCTTTCTTTGAGAACATGGGTGG<br>CTCTTAAAAGAGCCGT  |                                         |
| <i>Esrrb</i> _GFP_fw              | CATGCACAACTCTTCCTGGAGATGCTGGAGGCCAAGGTGGTGA<br>GCAAGGGCGAGGAGCT   |                                         |
| <i>Esrrb</i> _GFP_rv              | CGAGGCTGGTGGCTGTGGAGGTCTCCACTTGGATCGTGTC<br>TGAGGAGTGAATTGCGGCCG  |                                         |
| <i>Esrrb</i> _Extension_fw        | ACACTTCTACAGTGTGAAACTGCAGGGCAAGGTGCCCATGCACA<br>AACTTTCCTGGAGAT   |                                         |
| <i>Esrrb</i> _Extension_rv        | CTGGGACAGCTCAGAGCCCGATGCGGGTGTGAAAAAAGTCGAG<br>GCTGGTGGCTGTGGAG   |                                         |
| <i>Fam25c</i> _GFP_fw             | TGTTACCCATGCGGCAGAAGGCCTGGGAAGACTGGGACAG<br>GTGAGCAAGGGCGAGGAGCT  |                                         |
| <i>Fam25c</i> _GFP_rv             | TCACGTTTCACACTCTTTATTGACCTTCAGGAAGGGCCAG<br>TGAGGAGTGAATTGCGGCCG  |                                         |
| <i>Fam25c</i> _Extension_fw       | AGGAGGTCAGTGAAGAAGTCAACCCACACCATCACTGATGCTGTT<br>ACCCATGCGGCAGAAG |                                         |
| <i>Fam25c</i> _Extension_rv       | ATTCCATCCAACAGAGGTAAGTCAAGACTCTGTTACGTTTC<br>ACACTCTTATTGACC      |                                         |
| <i>Gata6</i> _GFP_fw              | CTCCGTGCGACAGGATCTTGGTGTGCTCTGGCCCTGGCC<br>GTGAGCAAGGGCGAGGAGCT   |                                         |
| <i>Gata6</i> _GFP_rv              | AATATCAGACACAAGTGGTATGAGGCCTTCAGAGCCCTCC<br>TGAGGAGTGAATTGCGGCCG  |                                         |

|                           |                                                                    |  |
|---------------------------|--------------------------------------------------------------------|--|
| <i>Gata6_Extension_fw</i> | CATAGGTGTCAGTCTGTCTCCCCTGCCGAAGTCACATCCTCCGT<br>GCGACAGGATTCTTG    |  |
| <i>Gata6_Extension_rv</i> | GTCTGCATTTTTGCTGCCATCTGGACTGCTGGACAATATCAGAC<br>ACAAGTGGTATGAGGC   |  |
| <i>Klf4_GFP_fw</i>        | CAGGTCGGACCACCTTGCCTTACACATGAAGAGGCACTTTGTGA<br>GCAAGGGCGAGGAGCT   |  |
| <i>Klf4_GFP_rv</i>        | AAAAAAAAAATACTGAACTCTCTCCTGGCAGTGTGGGTCA<br>TGAGGAGTGAATTGCGGCCG   |  |
| <i>Klf4_Extension_fw</i>  | ACCGGCCCTTTCAGTGCCAGAAGTGTGACAGGGCCTTTCCAGGT<br>CGGACCACCTTGCCCT   |  |
| <i>Klf4_Extension_rv</i>  | TCCCCTCGTGGGAAGACAGTGTGAAAGGTTAGAAAAAAAAATAC<br>TGA ACTCTCTCCTG    |  |
| <i>Nfya_GFP_fw</i>        | AGCTGACGAAGAAGCCATGACACAGATCATCCGAGTTTCCGTGA<br>GCAAGGGCGAGGAGCT   |  |
| <i>Nfya_GFP_rv</i>        | CCATTTCCAGAACAGTGGAGAGGACCGTGACTGATCAGCT<br>TGAGGAGTGAATTGCGGCCG   |  |
| <i>Nfya_Extension_fw</i>  | AGGACTGTTGTGCTGTCTCTCTGTAGGATCCAAACCAAGCTG<br>ACGAAGAAGCCATGAC     |  |
| <i>Nfya_Extension_rv</i>  | AGTGAGACTGTCAGTGCCCACTGGAAGTCAGTCCATTTCCAGA<br>ACAGTGGAGAGGACCG    |  |
| <i>Rpp25_GFP_fw</i>       | TCAGCCTGAGCCAGAGGCTGAGAATGAGGACAGGACCGCC<br>GTGAGCAAGGGCGAGGAGCT   |  |
| <i>Rpp25_GFP_rv</i>       | GTGTTGAAGATATATGATTTCAGTCGGTCTGGGTGGCTCAG<br>TGAGGAGTGAATTGCGGCCG  |  |
| <i>Rpp25_Extension_fw</i> | TGGGGGAATCTGCTGTGAAGAAGGCACCGCTAAGCGGTCTCAG<br>CCTGAGCCAGAGGCTG    |  |
| <i>Rpp25_Extension_rv</i> | TATGAAAGGTGCGTGTGTTGAAAGGTATGCAGGAGTGTGAAGA<br>TATATGATTCAGTCGG    |  |
| <i>Sox2_GFP_fw</i>        | CGGCACGGCCATTAACGGCACACTGCCCTGTGCGACATG<br>GTGAGCAAGGGCGAGGAGCT    |  |
| <i>Sox2_GFP_rv</i>        | CCTCCCAATTCCTTGTATCTCTTTGAAAATCTCTCCCCT<br>TGAGGAGTGAATTGCGGCCG    |  |
| <i>Sox2_Extension_fw</i>  | GACTGCACATGGCCAGCACTACCAGAGCGGCCCGGTGCCCGCA<br>CGGCCATTAACGGCA     |  |
| <i>Sox2_Extension_rv</i>  | ATTATCAGATTTTTCTACTCTCCTCTTTTTGCACCCCTCCCAAT<br>TCCCTTGTATCTCTT    |  |
| <i>TdGF1_GFP_fw</i>       | TTGTCTTTTCTCCAACGTTTTTACGAGCCGTCGAAGATG<br>GCTAGCAAAGGAGAAGAAT     |  |
| <i>TdGF1_GFP_rv</i>       | AAGTGGCTATCTCCAGCAACCAAAAAGTCAAGGTTA<br>TCGCGATTTTACCACATTTGTAGA   |  |
| <i>TdGF1_Extension_fw</i> | TGGCTTTATGAACTAAAGCCATCTGCTAATATTGTGTTTCTTGT<br>CTTTTCTCCAACGTT    |  |
| <i>TdGF1_Extension_rv</i> | GCAAGACAAAAATCAGAGCGTCATAGAACGTGATTTTCCGAAGT<br>GGCTATCTCCAGCAAC   |  |
| <i>Zfp42_GFP_fw</i>       | AGGAAGCAGCTAAGACAACATGAATGAACAAAAAATGAAT<br>GTGAGCAAGGGCGAGGAGCT   |  |
| <i>Zfp42_GFP_rv</i>       | GGGCTCTTCCGCCCGGCCCTTTCTGGCCACTTGTCT<br>TCGCGATTTTACCACATTTGTAGA   |  |
| <i>Zfp42_Extension_fw</i> | GATCAGTGCCCCCTGGAAGTGTGAGTCATAGGCATTGTTCAAGAAG<br>GAAGCAGCTAAGACAA |  |
| <i>Zfp42_Extension_rv</i> | ACTGGCCTTGCCCTGCTTGTCTTAGGGTCAGTCTGTGAGGGCT<br>CTTCCGCCCGGCCCT     |  |

| <b>Primers for sequencing</b> |                        |  |
|-------------------------------|------------------------|--|
| <i>Hist1h3a</i> -GFP_fw       | CCTTGTTGGGTCTGTTTGAGGA |  |
| GFP_rv                        | GTCTTGCTCAGGGCGGACT    |  |
